# Supplementary material
Source: PubMed Central journal article supplement (PMC6158406)
Supplement: zjv020183921s1.pdf [file zjv020183921s1.pdf]

## BHLF1 Probes

|                       |
|-----------------------|
| TCTGCTGGTCCGGTGCACCTG |
| AGCCGGGGTTCTGGCGCTCC  |
| GCACCGCTGCGCCGCCGCCAG |
| CCCCGCTCCGGGTGGGGGGTG |
| GCGGCCGCCGGTGGGTCCGC  |

## Control Probes (BHLF1)

|                       |
|-----------------------|
| CAGGTGCACCGGACCAGCAGA |
| GGAGCGCCAGGAACCCCGCT  |
| CTGGCGGGCGGCAGCGGTGC  |
| CACCCCCACCCGGAGCGGGG  |
| GCGGACCCACCGGCGGCCGC  |

## EBER1 Probes

|                       |
|-----------------------|
| TACCAGCTGGTGGTCCGCATG |
| ACTCTGCTTCTGCCGTCTTC  |
| AGGACGGTGTCTGTGTTTGTG |
| CCGTCCCGGTACAAGTCCCG  |
| GGGAGGAGACGTGTGTGGCTG |
| GACCTACGCTGCCCTAGAGGT |

## Control Probes (EBER1)

|                       |
|-----------------------|
| CATGCGGACCACCAGCTGGTA |
| GAAGACGGCAGAAAGCAGAGT |
| GACAACCACAGACACCGTCCT |
| CGGGACTTGTACCCGGGACGG |
| CAGCCACACAGTCTCCTCCC  |
| ACCTTAGGGCAGCGTAGGTC  |

## BMRF1 Probes

|                           |
|---------------------------|
| GCGGAGAGTCTGAGTGGTTTCC    |
| CAGGACGGCTAGGGCCTTGGTC    |
| GAGTCTGGGCATGGTCATAGCAC   |
| GGTTTACCTGCAGCACTCCTCC    |
| CCGGGGCCTCCATAGTTTACAG    |
| CGTGCTGCGTTGGCCACGG       |
| GGGGAGACCTCGAAGCTGATTAGC  |
| GTGATTCTGCCACTCGGCCACAG   |
| CTAATGACACGGCGCCGGG       |
| GACACAGGTGCGCCCGTAGG      |
| CAGCCGAGCCAAACAGCTCCTTG   |
| CCGCTTGTAATAATGCAGGGAAGCC |
| CAAATTCAGGCCGGGAACCCC     |
| GGTGTGGTGGCTCTTGGACACC    |
| CGGGGGCATATAGGGCATCAGG    |
| CTGCTCGTTCCTCAGCTGTGCG    |
| CTTGGGCATCAACAGCACCTGCC   |
| GTGCCACTTCTGCAACGAGG      |
| GTATGGCCCCACACTCAGAGGC    |
| CTTGGCCACAGGGCCAGTGAAG    |
| CCTCAACGGCCCCACGTCC       |
| CCGCTGCTACCGAGCAGACAAC    |
| GGCTAAGCGCCGCCGACG        |
| CACGCTAACGGCCGGAATGCG     |
| GGCCACCACAGCTATGATGCCAG   |
| CTAAGATCCAACGGCAGGTCCCC   |
| CGCCTCTTCGGAGGCGTGG       |
| CTTCTGGCTCAGAGGCCGTA CTG  |
| GTCCTGTGCCAGTGGTTGCAC     |
| GACCGTATGTCTGGGGCGTTG     |
| GAGGTGGCGGAGGTGAAGGAG     |
| GCCGGACTCTCCCAAGTAGGGG    |
| GGCAGGCGAGGGTGTCTCTG      |
| GCGGTGTTGCTGGAGTGGCTG     |
| GAGCTGAACAGCCAGAGCCCTC    |
| GCCTGGCCTCCGACGATGTCC     |
| GCCTGCTTCACTTCTTGGGGTGC   |

## Control Probes (BMRF1)

|                          |
|--------------------------|
| GGAACCACTCAGACTCTCCGC    |
| GACCAAGGCCCTAGCCGTCTCTG  |
| GTGCTATGACCATGCCAGACTC   |
| GGAGGAGTGTGCAGGTAACCC    |
| CTGTAACTATGGAGGCCCCCGG   |
| CCGTGGCCAACGCAGGCACG     |
| GCTAATCAGTTCGAGGTCTCCCC  |
| CTGTGGCCGAGTGGCAGAATCAC  |
| CCCGGCCGCCGTGTCAATTAG    |
| CCTACGGGCGCACCTGTGTCT    |
| CAAGGAGCTGTTTGGCTCGGCTG  |
| GGCTTCCCTGCAATTTACAAGCGG |
| GGGGTCCCGGCCGTAATTTG     |
| GGTGTCCAAGAGCCACCACACC   |
| CCTGATGCCCTATATGCCCCCG   |
| CGACAGGCTGAGGAACGAGCAG   |
| GGCAGGTGCTGTTGATGCCCAAG  |
| CCTCGTTGCAGAAGTGGGCAC    |
| GCCTCTGAGTGTGGGGCCATAC   |
| CTTCACTGGCCCTGTGGCCAAG   |
| GGACGTGGGGGCCGTTGAGG     |
| GTTGTCTGCTCGGTAGCAGCGG   |
| GTGGCGGCGGCCGCTTAGCC     |
| CGCATTCCGGCCGTTAGCGTG    |
| CTGGCATCATAGCTGTGGTGGCC  |
| GGGGACCTGCCGTTGGATCTTAG  |
| CCACGCCTCCGAAGAGGCG      |
| CAGTACGGCCTCTGAGCCAGAAG  |
| GTGCAACCACTGGGCACAGGAC   |
| CAACGCCCCAGACATACGGTC    |
| CTCCTTCACTCCGCCACCTC     |
| CCCCTACTTGGGAGAGTCCGGC   |
| CAGAGACACCCTCGCCTGCC     |
| CAGCCACTCCAGCAACACCCG    |
| GAGGCCTCTGCTGTTTCACTC    |
| GGACATCGTCGGAGGCCAGGC    |
| GCACCCCAAGAAAGTGAAGCAGGC |

**Table S1. Sequence information of probes used in RNA-FISH analyses.** All probes used in RNA-FISH analyses were custom-designed DNA oligonucleotides purchased from IDT.
